# Supplementary material for: DNA Replication Stress Is a Determinant of Chronological Lifespan in Budding Yeast
Source: PubMed Central journal article supplement (PMC1939877; doi:10.1371/journal.pone.0000748), 2007-08-15
Supplement: pone.0000748.s001.pdf [file pone.0000748.s001.pdf]

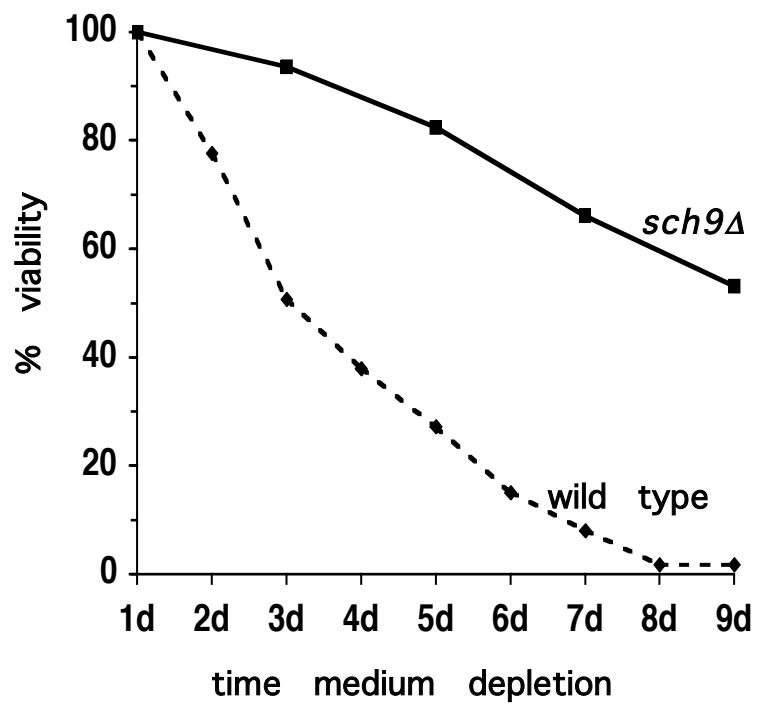

**Fig. S1 Weinberger et al.** Chronological lifespan of *sch9Δ* compared to wild-type cells (DBY746 background)
