# Supplementary material for: DNA Replication Stress Is a Determinant of Chronological Lifespan in Budding Yeast
Source: PubMed Central journal article supplement (PMC1939877; doi:10.1371/journal.pone.0000748), 2007-08-15
Supplement: pone.0000748.s002.pdf [file pone.0000748.s002.pdf]

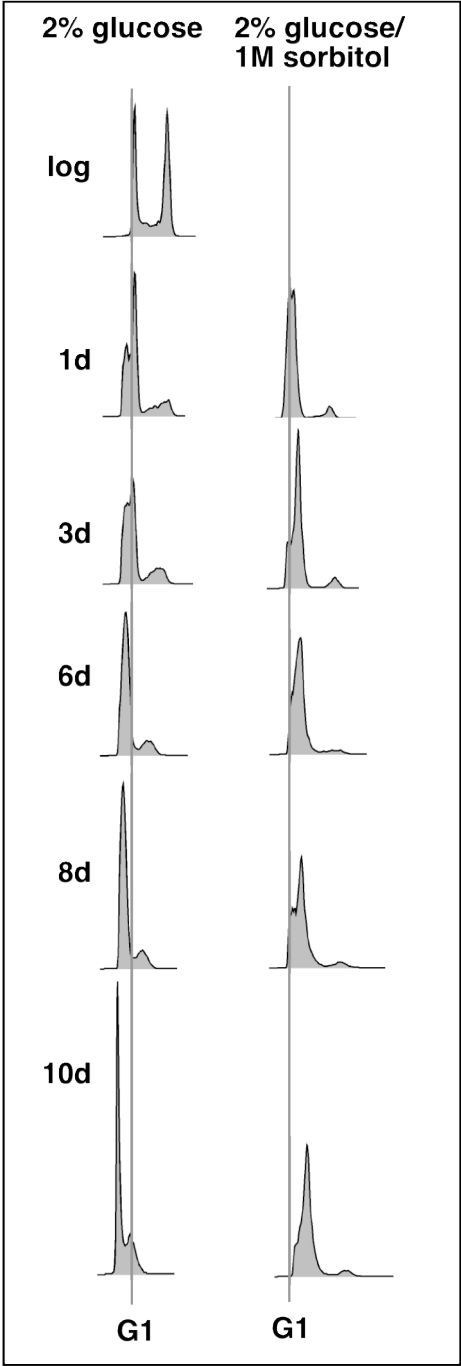

**Weinberger Fig. S2.** Effect of osmotic stress (1M sorbitol) on DNA content during medium depletion.
