# Supplementary material for: DNA Replication Stress Is a Determinant of Chronological Lifespan in Budding Yeast
Source: PubMed Central journal article supplement (PMC1939877; doi:10.1371/journal.pone.0000748), 2007-08-15
Supplement: pone.0000748.s003.pdf [file pone.0000748.s003.pdf]

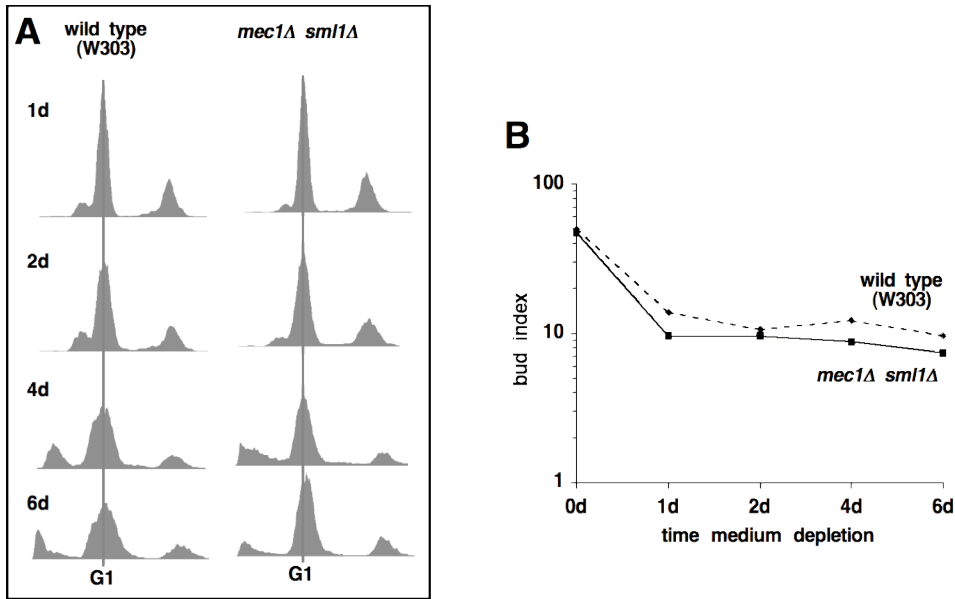

**Figure S3 Weinberger et al. In the absence of the ribonucleotide reductase inhibitor Sml1, deletion of *MEC1* does not alter the efficiency of G1 arrest during nutrient depletion. A.** FACS measurements of DNA content in wild type and *mec1Δ sml1Δ* cells at various times of nutrient depletion (indicated at left of FACS profiles). **B.** Budding indices of these cells.
