# Supplementary material for: DNA Replication Stress Is a Determinant of Chronological Lifespan in Budding Yeast
Source: PubMed Central journal article supplement (PMC1939877; doi:10.1371/journal.pone.0000748), 2007-08-15
Supplement: pone.0000748.s004.pdf [file pone.0000748.s004.pdf]

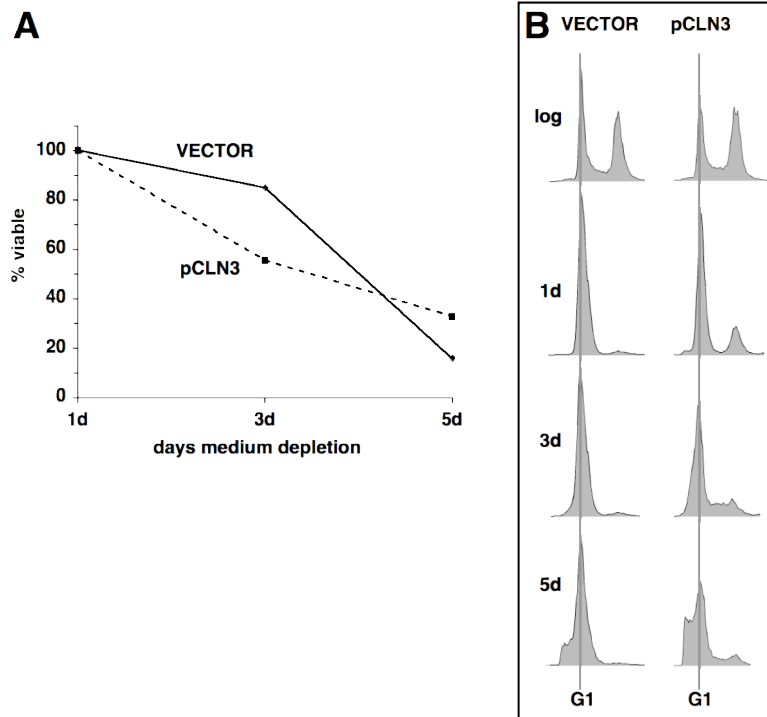

**Figure S4. Ectopic expression of *CLN3* paradoxically increases viability compared to vector-transformed control cells at the same time that it increases apoptotic degradation of DNA. A.** Viability of vector-transformed control cells “VECTOR” and cells ectopically expressing *CLN3* (“pCLN3”) during nutrient depletion. **B.** DNA content of these cells. Note that after 5 days of nutrient depletion, more cells ectopically expressing *CLN3* are viable compared to vector-transformed cells (Panel A) but a larger fraction of these cells also exhibit less than a G1 content of DNA, indicating apoptotic DNA degradation (Panel B).
