# Supplementary material for: DNA Replication Stress Is a Determinant of Chronological Lifespan in Budding Yeast
Source: PubMed Central journal article supplement (PMC1939877; doi:10.1371/journal.pone.0000748), 2007-08-15
Supplement: pone.0000748.s005.pdf [file pone.0000748.s005.pdf]

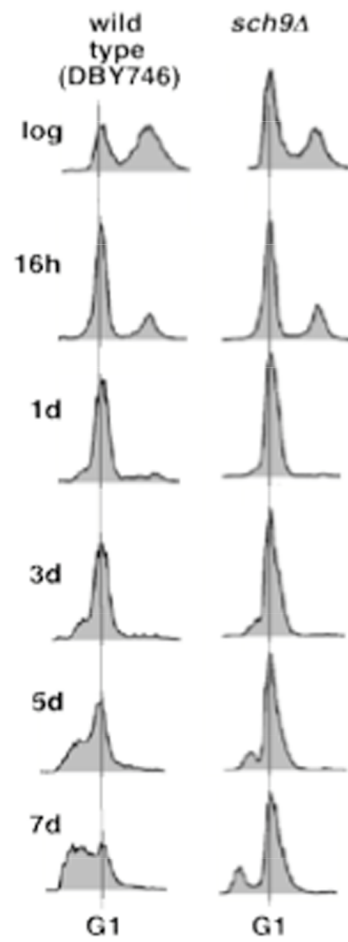

**Fig. S5.** *sch9Δ* induces a tighter G1 arrest and suppresses apoptosis in cells cultured in pre-depleted medium, similar to the effects of culturing these cells in medium that was not pre-depleted (compare to Fig. 1A)
